# Supplementary material
Source: PubMed Central journal article supplement (PMC2577249)
Supplement: pp.108.127639_1.pdf [file pp.108.127639_1.pdf]

**Supplementary Table 1. Molecular genetic description of the early flowering mutant collection.**

| Mutant genotype | Dominance | Allelic group   | T2 parental line | Kan R/S segregation | T-DNA linkage  | Identified locus    | FST characterized | FST genomic localization                                                         | Known or putative function                                         | Reference                   |
|-----------------|-----------|-----------------|------------------|---------------------|----------------|---------------------|-------------------|----------------------------------------------------------------------------------|--------------------------------------------------------------------|-----------------------------|
| eav1            | R         | no              | COV22            | nd                  | no             |                     |                   |                                                                                  |                                                                    |                             |
| eav2            | SemiD     | no              | CPV20            | 3/1                 | no             |                     |                   |                                                                                  |                                                                    |                             |
| eav4            | SemiD     | no              | CPX11            | 2/1                 | no             |                     |                   |                                                                                  |                                                                    |                             |
| eav5            | R         | eav11           | CSD15            | 2/1                 | no             |                     |                   |                                                                                  |                                                                    |                             |
| eav6            | R         | no              | CSE15            | 3/1                 | d<1%           |                     | Southern          |                                                                                  |                                                                    |                             |
| eav7            | R         | no              | CSH2             | 15% S               | no             |                     |                   |                                                                                  |                                                                    |                             |
| eav8            | R         | no              | CSR6             | 3/1                 | no             |                     |                   |                                                                                  |                                                                    |                             |
| eav9            | SemiD     | eav12           | CTA14            | 13% S               | no             |                     |                   |                                                                                  |                                                                    |                             |
| eav10           | R         | <i>elf4</i>     | CTK2             | 3/1                 | d<1%           | ELF4<br>(At2g40080) |                   |                                                                                  | regulator of circadian clock                                       | Doyle et al., 2002          |
| eav11           | R         | eav5            | CUA18            | 3/1                 | no             |                     |                   |                                                                                  |                                                                    |                             |
| eav12           | SemiD     | eav9            | CUQ17            | 3/1                 | no             |                     |                   |                                                                                  |                                                                    |                             |
| eav13           | R         | no              | CUS13            | 3/1                 | d<1%           |                     | Southern          |                                                                                  |                                                                    |                             |
| eav14           | R         | no              | CUX8             | 15/1                | d<1%           |                     |                   |                                                                                  |                                                                    |                             |
| eav15           | R         | eav37,<br>eav42 | DEK224           | 2/1                 | d<1%           |                     | 048C04            | into gene CPR5/HYS1<br>(At5g64930)                                               | regulator of expression of PR genes                                | Yoshida et al., 2002        |
| eav17           | SemiD     | no              | DFO10            | 2/1                 | no<br>(d=6.3%) |                     |                   |                                                                                  |                                                                    |                             |
| eav18           | R         | no              | DFQ16            | 3/1                 | no             |                     |                   |                                                                                  |                                                                    |                             |
| eav19           | R         | no              | DFS16            | 3/1                 | no             |                     |                   |                                                                                  |                                                                    |                             |
| eav21           | R         | <i>lhp1-1</i>   | DGU13            | 3/1                 | d<1%           | LHP1<br>(At5g17690) |                   |                                                                                  | chromatin protein                                                  | Gaudin et al., 2001         |
| eav22           | R         | no              | DTP49            | 17% S               | nd<br>(d<20%)  |                     | 193H07            | into At1g34250; 7557 bp upstream of At1g34245 ; 4252 bp downstream of At1g34260  | At1g34250 : transposable element                                   | none                        |
| eav23           | R         | <i>lhp1-2</i>   | DXT72            | 2/1                 | no             | LHP1<br>(At5g17690) |                   |                                                                                  | chromatin protein                                                  | Gaudin et al., 2001         |
| eav24           | R         | no              | DXW4             | 2/1                 | no             |                     |                   |                                                                                  |                                                                    |                             |
| eav25           | R         | no              | DXX1             | 3/1                 | no             |                     |                   |                                                                                  |                                                                    |                             |
| eav28           | R         | no              | DYA37            | 15/1                | d<1%           |                     | 104B01            | 585 bp downstream of At4g08360 (GTA02-like gene) ; 4369 bp upstream of At4g08370 | GTA02-like : KOW-domain SPT5-like transcription elongation protein | none                        |
| eav29           | R         | no              | DYA100           | 3/1                 | no             |                     |                   |                                                                                  |                                                                    |                             |
| eav30           | SemiD     | no              | DYB43            | 3/1                 | d<1%           |                     | lab               | into last intron of AGL27/FLM/MAF1                                               | MADS-box transcription factor                                      | Werner et al., 2005 ; Oh et |

|       |       |                 |        |       |                 |                         |                   |                                                                                                         |                                                                   |                          |
|-------|-------|-----------------|--------|-------|-----------------|-------------------------|-------------------|---------------------------------------------------------------------------------------------------------|-------------------------------------------------------------------|--------------------------|
|       |       |                 |        |       |                 |                         | (At1g77080)       |                                                                                                         |                                                                   | al., 2004                |
| eav31 | R     | no              | DYB271 | 3/1   | d<1.9%          |                         |                   |                                                                                                         |                                                                   |                          |
| eav32 | R     | eav33,<br>eav46 | DYC203 | 3/1   | no              |                         |                   |                                                                                                         |                                                                   |                          |
| eav33 | R     | eav32,<br>eav46 | DYE15  | 15/1  | d<1%            |                         | 192B06/<br>193A08 | into gene XTH3 (At3g25050)                                                                              | xyloglucan<br>endotransglucosylase                                | Yokoyama et<br>al., 2001 |
| eav34 | R     | no              | DYE164 | 63/1  | no              |                         |                   |                                                                                                         |                                                                   |                          |
| eav35 | R     | no              | DYH67  | 2/1   | no              |                         |                   |                                                                                                         |                                                                   |                          |
| eav37 | R     | eav15,<br>eav42 | DYJ8   | 15/1  | no              |                         |                   |                                                                                                         |                                                                   |                          |
| eav38 | R     | no              | DYK121 | 3/1   | no              |                         |                   |                                                                                                         |                                                                   |                          |
| eav39 | R     | no              | DYN78  | 15/1  | d<1%            |                         | 122H12/<br>128E03 | into gene At3g09190                                                                                     | pseudogene, receptor-like<br>protein kinase like                  | none                     |
| eav40 | R     | no              | DYO7   | 15/1  | d<1%            |                         | Southern          |                                                                                                         |                                                                   |                          |
| eav41 | SemiD | no              | DYP95  | 3/1   | no              |                         |                   |                                                                                                         |                                                                   |                          |
| eav42 | R     | eav15,<br>eav37 | DYR43  | 3/1   | d<1%            |                         | 194A02/<br>195F11 | 377 bp downstream of<br>At5g65870 (ATPSK5) ; 286 bp<br>upstream of At5g65880<br>(hypothetical protein)  | ATPSK5 : phyto­sulfokine 5<br>precursor, peptide growth<br>factor | Yoshida et al.,<br>2002  |
| eav43 | SemiD | no              | DZE80  | 63/1  | nd              |                         | 195G06            | into first intron of gene<br>At5g51930                                                                  | glucose-methanol-choline<br>(GMC) oxidoreductase                  | none                     |
| eav46 | R     | eav32,<br>eav33 | DZT11  | 17% S | no              |                         |                   |                                                                                                         |                                                                   |                          |
| eav47 | nd    | no              | DZZ92  | 80% S | nd              |                         |                   |                                                                                                         |                                                                   |                          |
| eav49 | R     | no              | DZZ232 | 2/1   | no              |                         |                   |                                                                                                         |                                                                   |                          |
| eav50 | R     | no              | EAB21  | 3/1   | no              |                         |                   |                                                                                                         |                                                                   |                          |
| eav51 | SemiD | no              | EAB60  | 16% S | nd<br>(d<33.3%) |                         | 017B05            | 1606 bp downstream of<br>At3g51080 (GATA6) ; 1864 bp<br>upstream of At3g51090<br>(hypothetical protein) | GATA6 : zinc finger (GATA<br>type) transcription factor           | Manfield et al.,<br>2007 |
| eav52 | R     | no              | EAB68  | 15/1  | d<10%           |                         |                   |                                                                                                         |                                                                   |                          |
| eav53 | R     | no              | EAC59  | 63/1  | nd              |                         |                   |                                                                                                         |                                                                   |                          |
| eav54 | R     | <i>elf3</i>     | EAF41  | 15/1  | no              | ELF3 (near<br>At2g6845) |                   |                                                                                                         | regulator of circadian clock                                      | Hicks et al.,<br>2001    |
| eav55 | R     | no              | EAF72  | 15/1  | nd<br>(d<25%)   |                         |                   |                                                                                                         |                                                                   |                          |
| eav56 | R     | no              | EAH7   | 2/1   | no              |                         |                   |                                                                                                         |                                                                   |                          |

|       |       |             |        |      |               |                     |                   |                                                                                                   |                                          |                          |
|-------|-------|-------------|--------|------|---------------|---------------------|-------------------|---------------------------------------------------------------------------------------------------|------------------------------------------|--------------------------|
| eav57 | SemiD | no          | EAI164 | 3/1  | d<10%         |                     | 194F11/<br>204H08 | 1752 bp downstream of<br>At3g57390 (AGL18) ; 711 bp<br>upstream of At3g57400<br>(unknown protein) | AGL18 : MADS-box<br>transcription factor | Adamczyk et<br>al., 2007 |
| eav58 | SemiD | no          | EAI247 | 15/1 | nd<br>(d<20%) |                     |                   |                                                                                                   |                                          |                          |
| eav59 | R     | no          | EAI285 | 3/1  | no            |                     |                   |                                                                                                   |                                          |                          |
| eav60 | R     | no          | EAI353 | 3/1  | d<2.1%        |                     |                   |                                                                                                   |                                          |                          |
| eav61 | R     | <i>elf4</i> | EAI439 | nd   | no            | ELF4<br>(At2g40080) |                   |                                                                                                   | regulator of circadian clock             | Doyle et al.,<br>2002    |

The eav mutants were obtained from T2 parental lines of the Versailles collection, INRA, France (Bechtold et al., 1993; <http://dbsgap.versailles.inra.fr/portail/>). Recessive (R) and semi-dominant (SemiD) alleles were determined. Complementation analyses identified 5 allelic groups each comprising 2 or 3 alleles (as indicated by similarly coloured cells). Segregations of the kanamycin resistance marker (KanaR/S: kanamycin resistant/sensitive) in the parental lines are described in the dbsgap database. The linkage between early flowering phenotypes and T-DNA insertions (T-DNA linkage) was analyzed and specific loci were identified based on genetic crosses or by cloning. For mutations linked to a T-DNA insertion, preliminary molecular analysis was conducted by characterizing T-DNA flanking sequences. For three mutants, Southern analyses revealed complex insertions. Codes for FSTs available in the FLAGdb++ database are indicated.
