# Supplementary material
Source: PubMed Central journal article supplement (PMC2577249)
Supplement: pp.108.127639_2.pdf [file pp.108.127639_2.pdf]

**Supplementary Table 2. Phenotypic characterisation of the early flowering mutant collection.**

| Mutant genotype | Pce (h) <sup>a</sup> | Pc (h) <sup>a</sup> | QRP Class       | Light integral to bolting <sup>b</sup> | Circadian period <sup>c</sup> | Leaf number under LD <sup>b</sup> | Hypocotyl in the light <sup>d</sup> | Hypocotyl in the dark <sup>d</sup> | Sensitivity to sucrose <sup>d</sup> | Nb of changes in morphology <sup>d</sup> |
|-----------------|----------------------|---------------------|-----------------|----------------------------------------|-------------------------------|-----------------------------------|-------------------------------------|------------------------------------|-------------------------------------|------------------------------------------|
| eav1            | 10                   | 16                  | 1               | ns                                     | long (25.7 +/- 0.3h)          | reduced                           | short                               | short                              | N                                   | 13                                       |
| eav2            | 10                   | 16                  | 1               | ns                                     | long (25.5 +/- 0.4 h)         | reduced                           | N                                   | short                              | low                                 | 11                                       |
| eav4            | 10                   | 16                  | 1               | ns                                     | long (26.1 +/- 0.3h)          | reduced                           | N                                   | N                                  | N                                   | 4                                        |
| eav5            | 11                   | 16                  | 1               | lower***                               | N                             | reduced                           | N                                   | short                              | N                                   | 8                                        |
| eav6            | 9                    | 16                  | 1               | ns                                     | N                             | reduced                           | N                                   | short                              | N                                   | 13                                       |
| eav7            | 8                    | 14                  | 3               | lower **                               | N                             | reduced                           | long                                | N                                  | low                                 | 7                                        |
| eav8            | 11                   | 14                  | 2               | ns                                     | nd                            | reduced                           | N                                   | N                                  | N                                   | 3                                        |
| eav9            | 10                   | 14                  | 2               | lower ***                              | N                             | N                                 | long                                | N                                  | N                                   | 1                                        |
| eav10           | no                   | no                  | 6 (day-neutral) | lower **                               | arrhythmic                    | reduced                           | long                                | N                                  | N                                   | 7                                        |
| eav11           | 11                   | 14                  | 2               | lower ***                              | N                             | reduced                           | N                                   | short                              | N                                   | 10                                       |
| eav12           | 10                   | 14                  | 2               | lower ***                              | N                             | reduced                           | long                                | N                                  | N                                   | 0                                        |
| eav13           | 7                    | 14                  | 4               | ns                                     | N                             | reduced                           | N                                   | N                                  | N                                   | 4                                        |
| eav15           | 10                   | 16                  | 1               | ns                                     | long (25.5 +/- 0.1h)          | reduced                           | long                                | short                              | high                                | 11                                       |
| eav17           | 8                    | 14                  | 3               | ns                                     | N                             | reduced                           | N                                   | N                                  | N                                   | 5                                        |
| eav18           | 9                    | 14                  | 2               | lower ***                              | long (25.5 +/-0.2h)           | reduced                           | N                                   | short                              | N                                   | 8                                        |
| eav19           | 8                    | 16                  | 7 (normal)      | lower **                               | N                             | reduced                           | N                                   | N                                  | N                                   | 7                                        |
| eav21           | no                   | no                  | 6 (day-neutral) | lower ***                              | N                             | reduced                           | short                               | short                              | N                                   | 10                                       |
| eav22           | 11                   | 16                  | 1               | ns                                     | N                             | reduced                           | long                                | N                                  | N                                   | 7                                        |
| eav23           | no                   | no                  | 6 (day-neutral) | lower ***                              | nd                            | reduced                           | short                               | short                              | N                                   | 14                                       |
| eav24           | 8                    | 14                  | 3               | lower *                                | N                             | reduced                           | short                               | N                                  | medium                              | 11                                       |
| eav25           | 8                    | 14                  | 3               | lower *                                | N                             | reduced                           | long                                | N                                  | N                                   | 0                                        |
| eav28           | 10                   | 16                  | 1               | ns                                     | N                             | reduced                           | N                                   | N                                  | N                                   | 3                                        |
| eav29           | 12                   | 16                  | 1               | ns                                     | N                             | N                                 | N                                   | short                              | low                                 | 3                                        |
| eav32           | 8                    | 13                  | 3               | lower ***                              | N                             | N                                 | long                                | N                                  | medium                              | 10                                       |
| eav33           | 8                    | 12                  | 3               | lower ***                              | N                             | N                                 | long                                | N                                  | medium                              | 12                                       |
| eav34           | 10                   | 16                  | 1               | ns                                     | N                             | N                                 | N                                   | N                                  | N                                   | 5                                        |
| eav35           | 8                    | 12                  | 3               | lower ***                              | N                             | reduced                           | long                                | N                                  | N                                   | 6                                        |
| eav37           | 10                   | 16                  | 1               | ns                                     | long (25.8 +/- 0.3h)          | reduced                           | long                                | short                              | high                                | 14                                       |
| eav38           | 8                    | 16                  | 7 (normal)      | ns                                     | long (25.1 +/- 0.2h)          | reduced                           | long                                | N                                  | low                                 | 2                                        |
| eav39           | 6                    | 14                  | 4               | lower *                                | long (26.6 +/- 0.2h)          | reduced                           | long                                | N                                  | N                                   | 14                                       |
| eav40           | no                   | no                  | 6 (day-neutral) | lower **                               | nd                            | reduced                           | N                                   | N                                  | N                                   | 16                                       |
| eav41           | 10                   | 14                  | 2               | lower ***                              | short (22.5 +/-0.8h)          | reduced                           | long                                | N                                  | low                                 | 0                                        |
| eav42           | 8                    | 16                  | 7 (normal)      | ns                                     | long (25.4 +/- 0.2h)          | reduced                           | long                                | short                              | high                                | 12                                       |
| eav43           | 10                   | 16                  | 1               | ns                                     | N                             | N                                 | short                               | short                              | medium                              | 16                                       |

|              |    |    |                 |           |                       |         |       |       |        |    |
|--------------|----|----|-----------------|-----------|-----------------------|---------|-------|-------|--------|----|
| <b>eav46</b> | 6  | 14 | 4               | lower *** | N                     | N       | long  | N     | medium | 7  |
| <b>eav47</b> | 8  | 16 | 7 (normal)      | lower **  | nd                    | N       | N     | short | low    | 7  |
| <b>eav49</b> | 7  | 14 | 4               | lower *** | nd                    | N       | long  | N     | high   | 10 |
| <b>eav50</b> | 8  | 16 | 7 (normal)      | ns        | nd                    | N       | N     | N     | N      | 2  |
| <b>eav51</b> | 6  | 14 | 4               | lower *** | nd                    | N       | long  | N     | N      | 9  |
| <b>eav52</b> | 7  | 16 | 5               | ns        | N                     | N       | N     | short | N      | 8  |
| <b>eav53</b> | 8  | 16 | 7 (normal)      | ns        | long (25.0 +/- 0.3h)  | reduced | N     | N     | N      | 6  |
| <b>eav54</b> | no | no | 6 (day-neutral) | lower *** | arrhythmic            | reduced | long  | N     | N      | 10 |
| <b>eav55</b> | 8  | 16 | 7 (normal)      | ns        | long (25.2 +/- 0.3h)  | reduced | N     | N     | N      | 9  |
| <b>eav56</b> | 8  | 16 | 7 (normal)      | lower **  | nd                    | reduced | short | N     | N      | 8  |
| <b>eav57</b> | 10 | 16 | 1               | lower *   | nd                    | N       | long  | short | N      | 7  |
| <b>eav58</b> | 8  | 14 | 3               | lower **  | long (25.3 +/- 0.5h)  | N       | long  | N     | low    | 6  |
| <b>eav59</b> | 8  | 16 | 7 (normal)      | ns        | long (25.0 +/- 0.3h)  | N       | N     | N     | N      | 6  |
| <b>eav60</b> | 6  | 13 | 4               | lower **  | short (23.1 +/- 0.3h) | N       | short | short | N      | 13 |
| <b>eav61</b> | no | no | 6 (day-neutral) | lower **  | arrhythmic            | reduced | long  | N     | N      | nd |

<sup>a</sup> The wild type (Ws) Pce and Pc were 8 h and 16 h, respectively. QRP (Quantitative Response to Photoperiod) classes are described in Table 1. <sup>b</sup> Significant variation in the light integral to bolting (mean time under photosynthetically active light before bolting under photoperiods ranging from 8 h to 16 h) were determined by a t-test: \* p<0.02 ; \*\* p<0.01 ; \*\*\* p<0.001 ; ns = not significant. The light integral to bolting in the wild type was 15.8 +/- 3.1 days (Pouteau et al., 2006). <sup>c</sup> Period values shown are averages +/- SEMs. The wild-type period was 24.1 +/- 2 h ; mutant values were compared to wild-type values using a t-test and differences considered significant when p<0.01 ; N: similar to the wild-type ; nd: not determined. <sup>d</sup> Minimum numbers of leaves under long days, hypocotyl elongation in light and in darkness, sensitivity to high concentrations of sucrose, and alterations in morphological traits (28 traits analyzed) are as described in Pouteau et al., 2004.
